# Supplementary material
Source: MDPI journal article supplement (https://www.mdpi.com/2073-4344/11/11/1269)
Supplement: s1 [file s1 › catalysts-1414934-supplementary.pdf]

# Naphthyl-naphthalimides as high performance visible light photoinitiators for 3D printing and photocomposites synthesis

Mahmoud Rahal <sup>1,2,3</sup>, Bernadette Graff <sup>1,2</sup>, Joumana Toufaily <sup>3</sup>, Tayssir Hamieh <sup>3,4</sup>, Malika Ibrahim-Ouali <sup>5</sup>, Frédéric Dumur <sup>6\*</sup> and Jacques Lalevée <sup>1,2,\*</sup>

<sup>1</sup> Université de Haute-Alsace, CNRS, IS2M UMR 7361, F-68100 Mulhouse, France.

[mahmoud-rahah@outlook.com](mailto:mahmoud-rahah@outlook.com) (M.R); [haifaa.mokbel@uha.fr](mailto:haifaa.mokbel@uha.fr) (H.F); [bernadette.graff@uha.fr](mailto:bernadette.graff@uha.fr) (B.G).

<sup>2</sup> Université de Strasbourg, F-67200 Strasbourg, France.

<sup>3</sup> Laboratory of Materials, Catalysis, Environment and Analytical Methods (MCEMA) and LEADDER Laboratory, Faculty of Sciences, Doctoral School of Sciences and Technology (EDST), Lebanese University, Beirut 6573-14, Lebanon; [tayssir.hamieh@ul.edu.lb](mailto:tayssir.hamieh@ul.edu.lb) (T.H), [Joumana.toufaily@ul.edu.lb](mailto:Joumana.toufaily@ul.edu.lb) (J.T).

<sup>4</sup> SATIE-IFSTTAR, Université Gustave Eiffel, Campus de Marne-La-Vallée, 25, allée des Marronniers, F-78000 Versailles, France. [tayssir.hamieh@ul.edu.lb](mailto:tayssir.hamieh@ul.edu.lb) (T.H).

<sup>5</sup> Aix Marseille Univ, CNRS, Centrale Marseille, iSm2, F-13397 Marseille, France

<sup>6</sup> Aix Marseille Univ, CNRS, ICR UMR 7273, F-13397 Marseille, France

\* Corresponding authors: [frederic.dumur@univ-amu.fr](mailto:frederic.dumur@univ-amu.fr) (FD); [jacques.lalevee@uha.fr](mailto:jacques.lalevee@uha.fr) (J. L)

All reagents and solvents were purchased from Aldrich or Alfa Aesar and used as received without further purification. Mass spectroscopy was performed by the Spectropole of Aix-Marseille University. ESI mass spectral analyses were recorded with a 3200 QTRAP (Applied Biosystems SCIEX) mass spectrometer. The HRMS mass spectral analysis was performed with a QStar Elite (Applied Biosystems SCIEX) mass spectrometer. Elemental analyses were recorded with a Thermo Finnigan EA 1112 elemental analysis apparatus driven by the Eager 300 software. <sup>1</sup>H and <sup>13</sup>C NMR spectra were determined at room temperature in 5 mm o.d. tubes on a Bruker Avance 400 or a Bruker Avance 300 spectrometer of the Spectropole: <sup>1</sup>H (400 MHz), <sup>1</sup>H (300 MHz), <sup>13</sup>C (100 MHz), and <sup>13</sup>C (75 MHz). All <sup>1</sup>H chemical shifts were referenced to the solvent peak CDCl<sub>3</sub> (7.26 ppm), DMSO-d<sub>6</sub> (2.49 ppm) and the <sup>13</sup>C chemical shifts were referenced to the solvent peak CDCl<sub>3</sub> (77.0 ppm). All photoinitiators were prepared with analytical purity up to accepted standards for new organic compounds (>98%) which was checked by high field NMR analysis.

$^1\text{H}$  NMR spectrum of 6-bromo-2-(naphthalen-1-yl)-1H-benzo[de]isoquinoline-1,3(2H)-dione

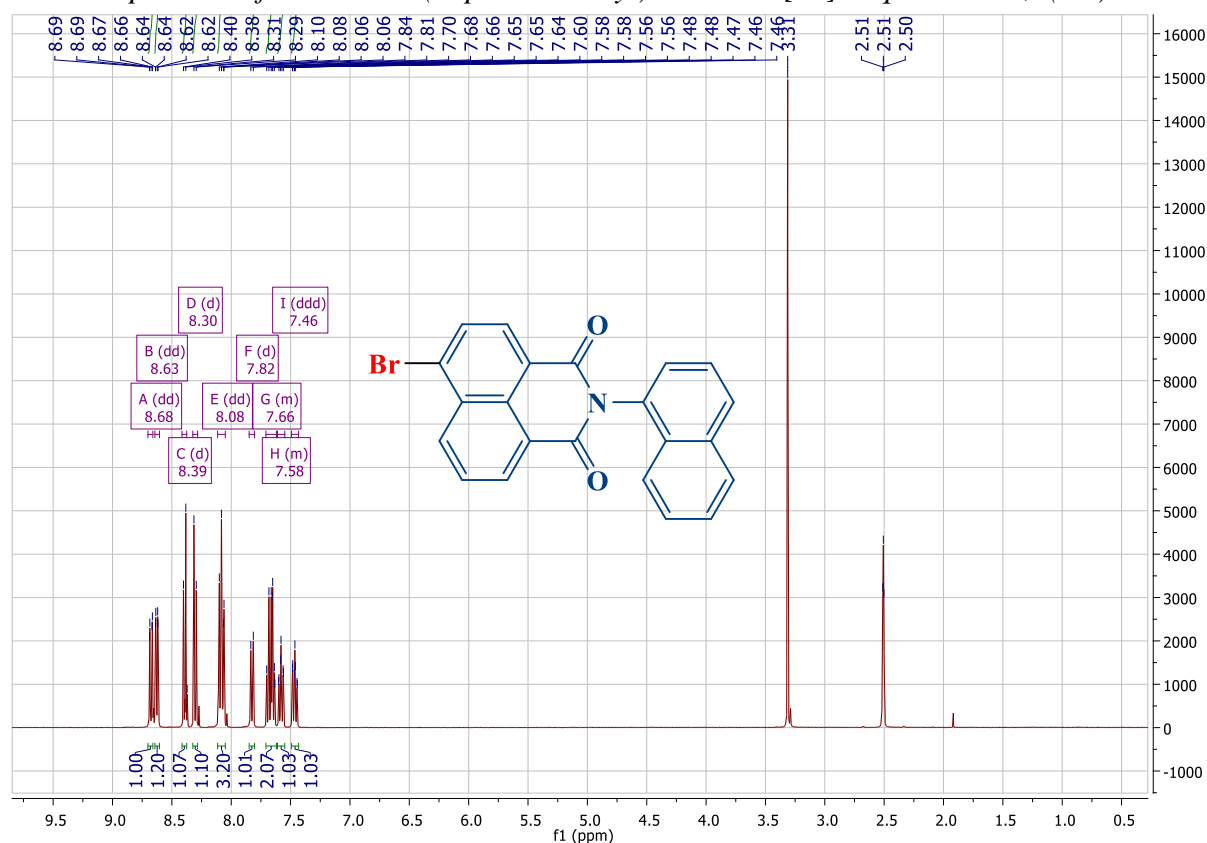

$^{13}\text{C}$  NMR spectrum of 6-bromo-2-(naphthalen-1-yl)-1H-benzo[de]isoquinoline-1,3(2H)-dione

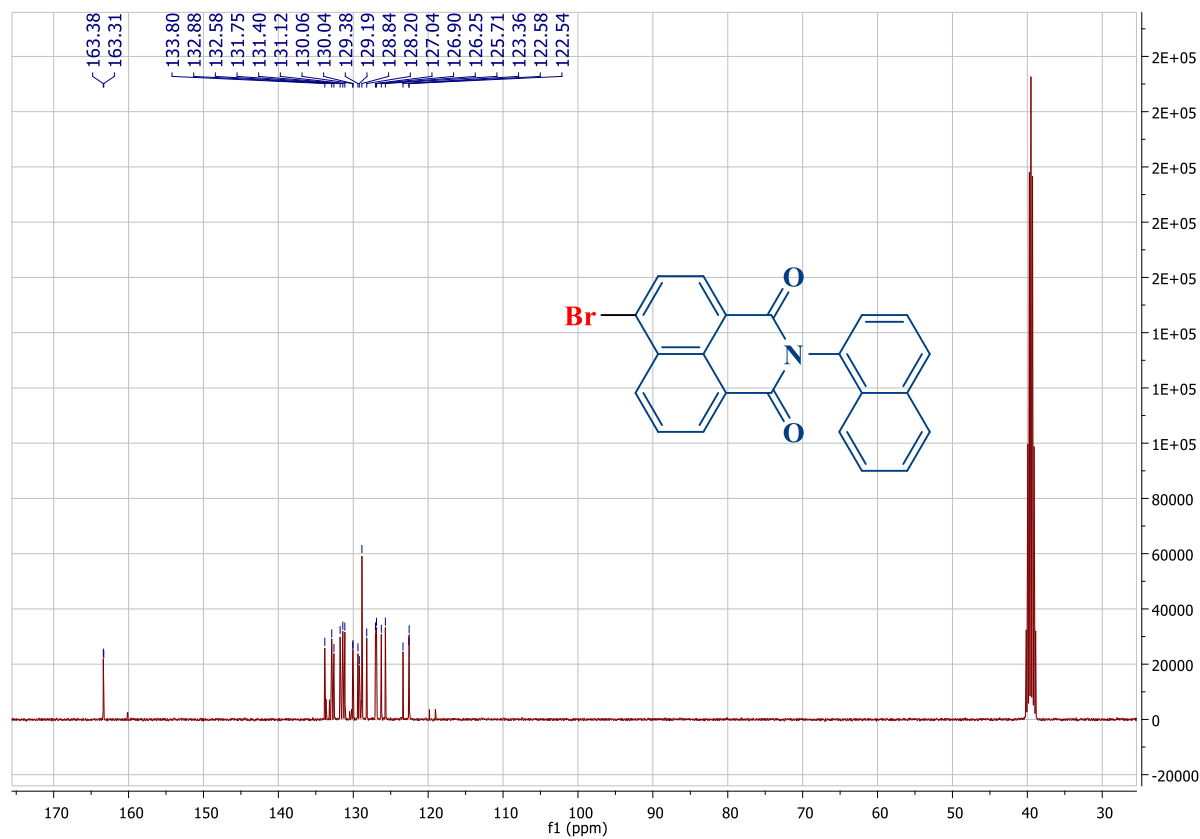

$^1\text{H}$  NMR spectrum of 2-(naphthalen-1-yl)-6-(pyrrolidin-1-yl)-1H-benzo[de]isoquinoline-1,3(2H)-dione (Naphth-1)

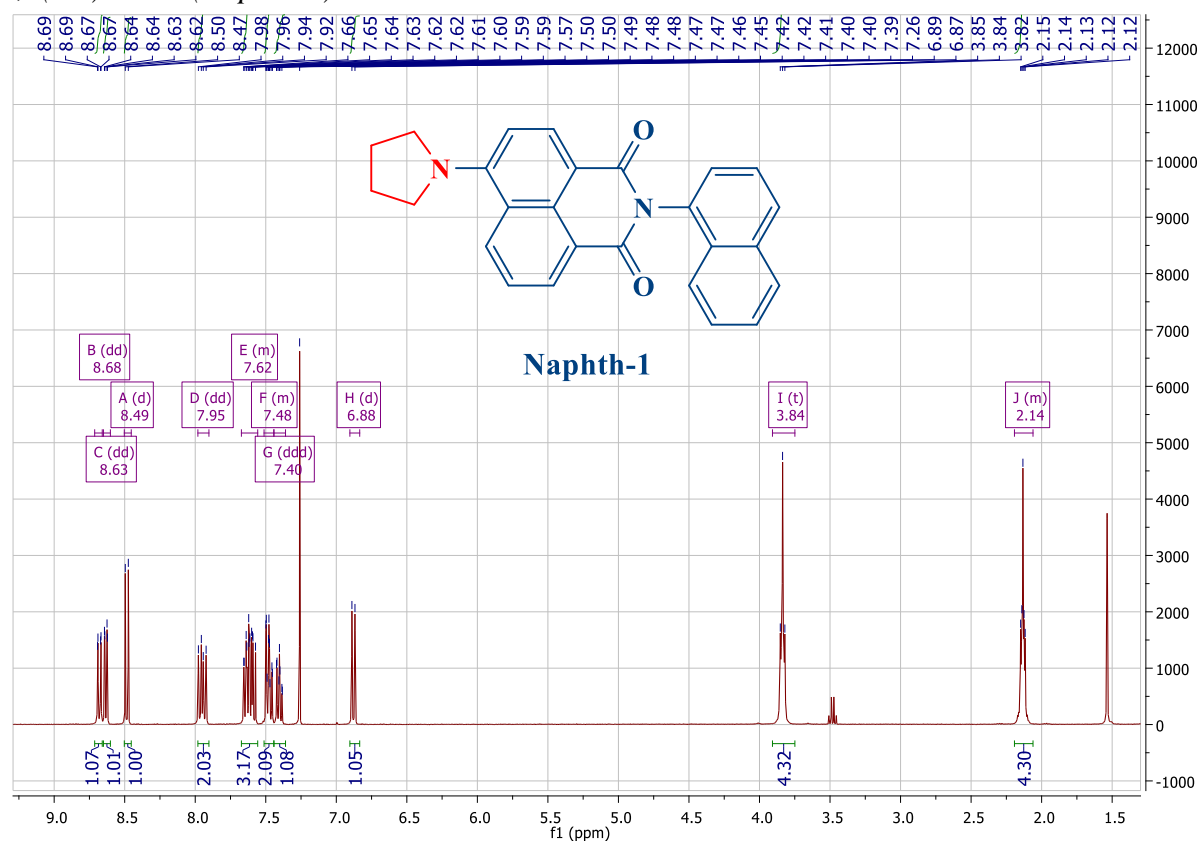

$^{13}\text{C}$  NMR spectrum of 2-(naphthalen-1-yl)-6-(pyrrolidin-1-yl)-1H-benzo[de]isoquinoline-1,3(2H)-dione (Naphth-1)

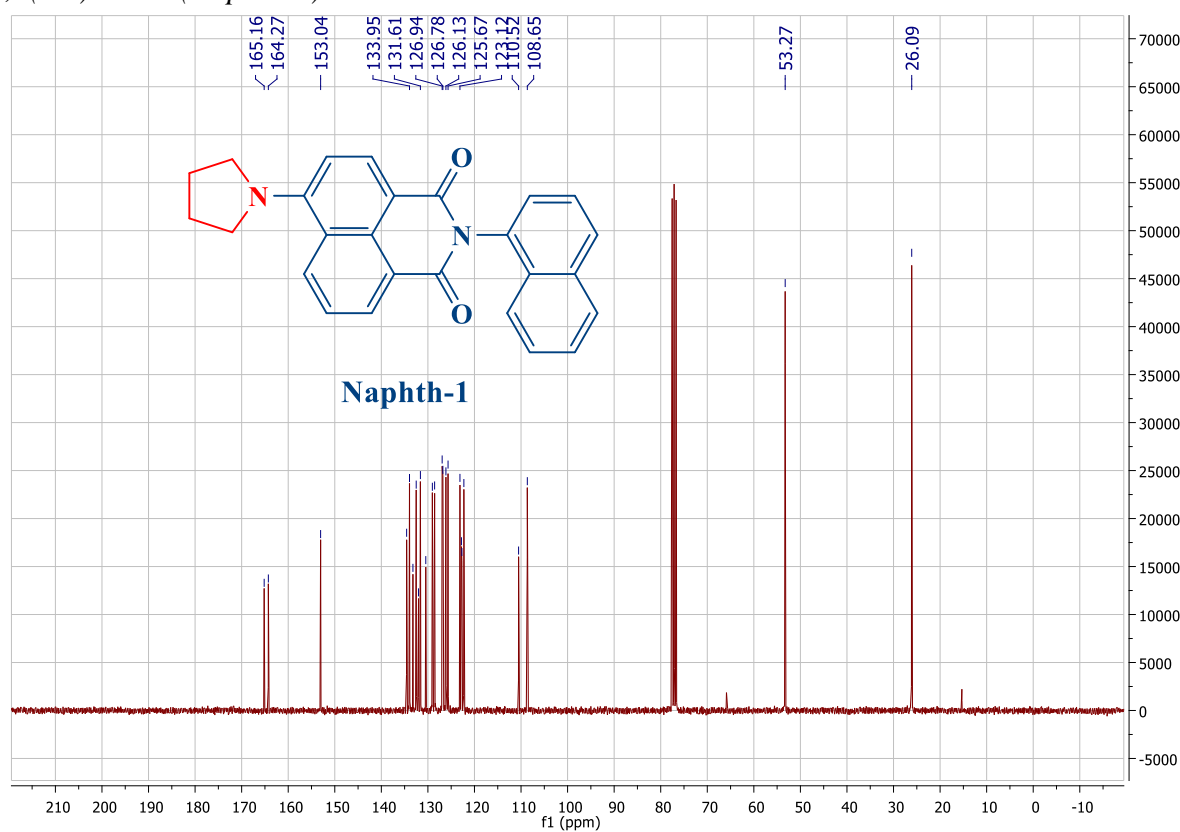

$^1\text{H}$  NMR spectrum of 2-(naphthalen-1-yl)-6-(piperidin-1-yl)-1H-benzo[de]isoquinoline-1,3(2H)-dione (Naphth-2)

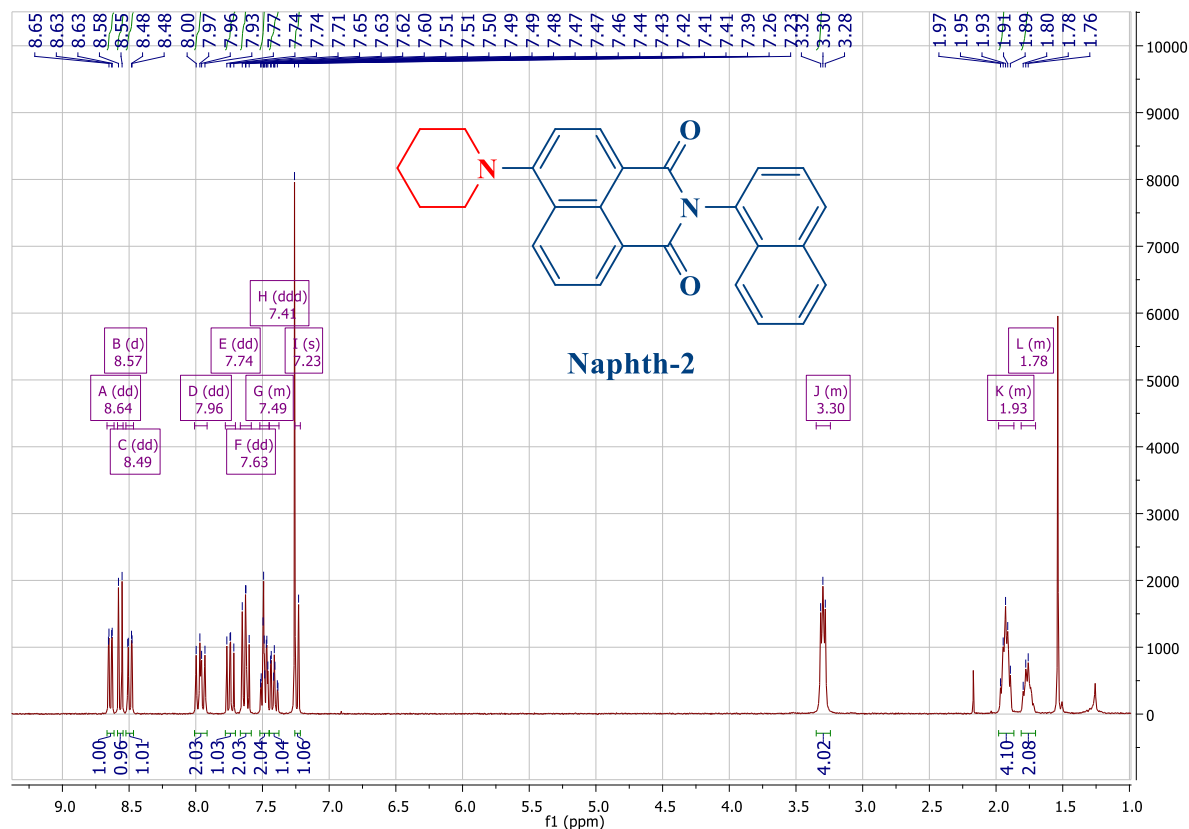

$^{13}\text{C}$  NMR spectrum of 2-(naphthalen-1-yl)-6-(piperidin-1-yl)-1H-benzo[de]isoquinoline-1,3(2H)-dione (Naphth-2)

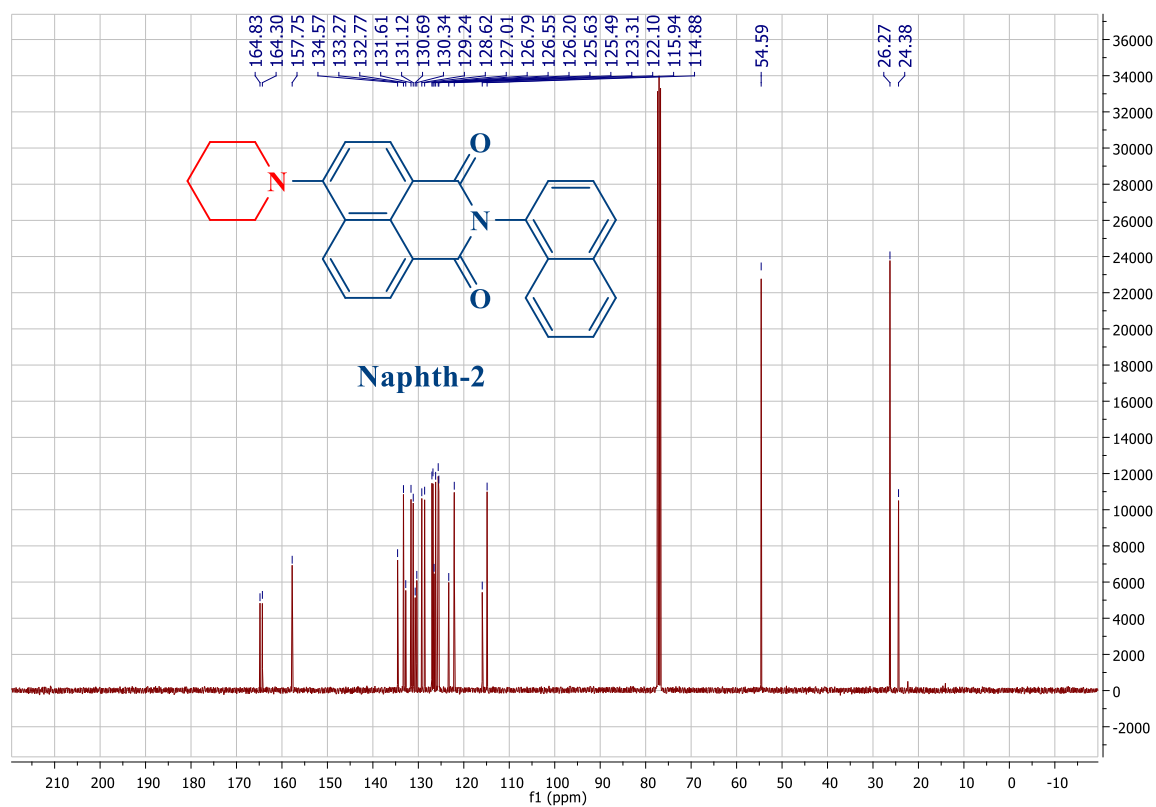

$^1\text{H}$  NMR spectrum of 6-morpholino-2-(naphthalen-1-yl)-1H-benzo[de]isoquinoline-1,3(2H)-dione (Naphth-3)

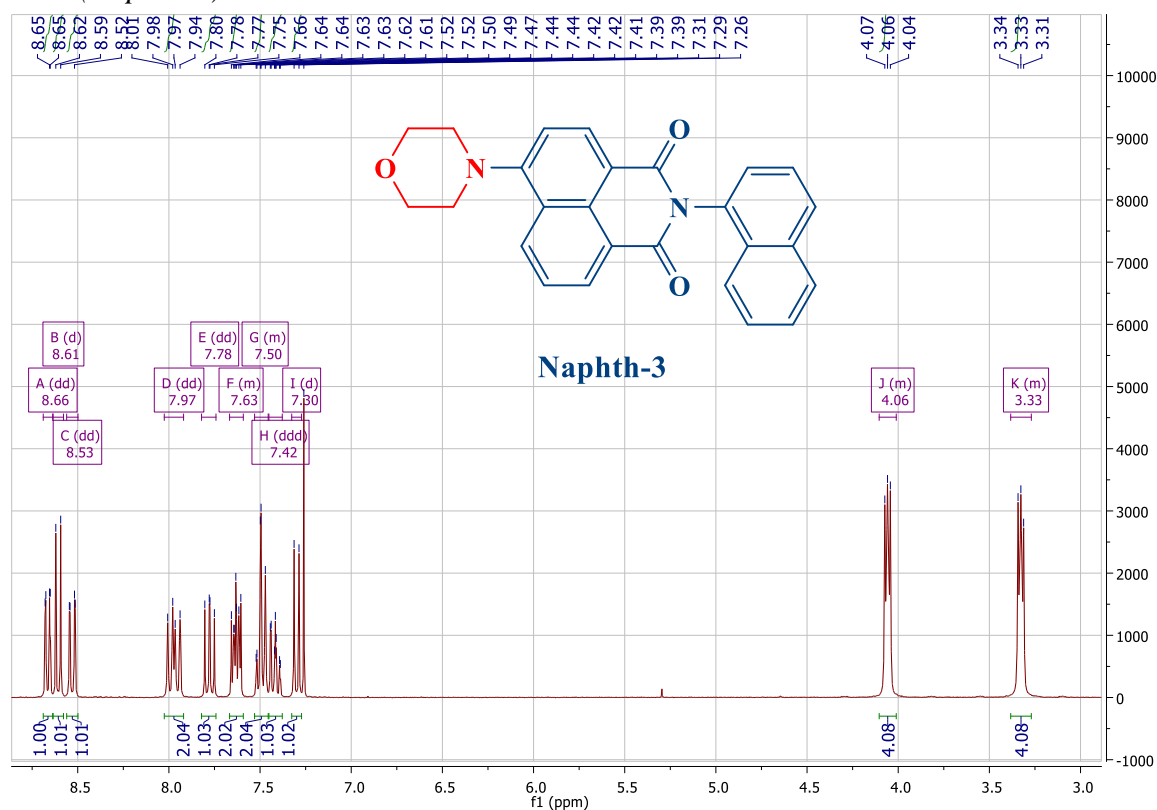

$^{13}\text{C}$  NMR spectrum of 6-morpholino-2-(naphthalen-1-yl)-1H-benzo[de]isoquinoline-1,3(2H)-dione (Naphth-3)

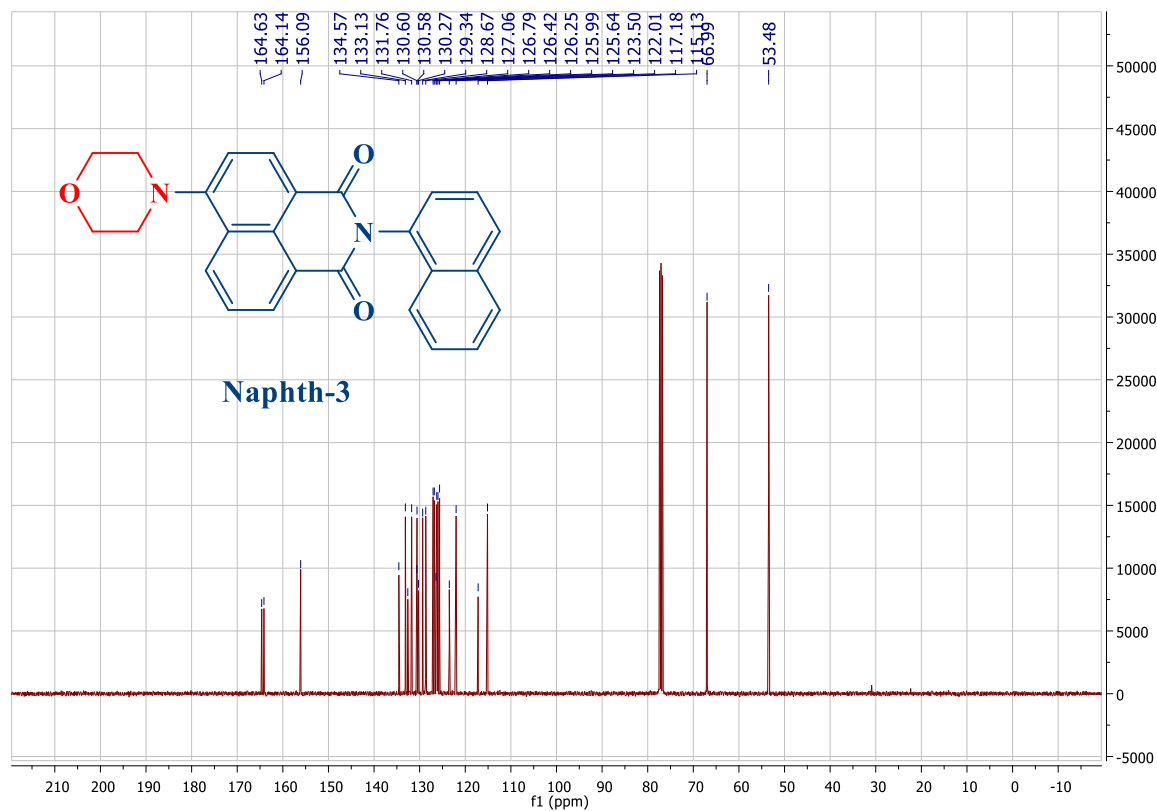

$^1\text{H}$  NMR spectrum of 6-(4-Methylpiperazin-1-yl)-2-(naphthalen-1-yl)-1H-benzo[de]isoquinoline-1,3(2H)-dione (Naphth-4)

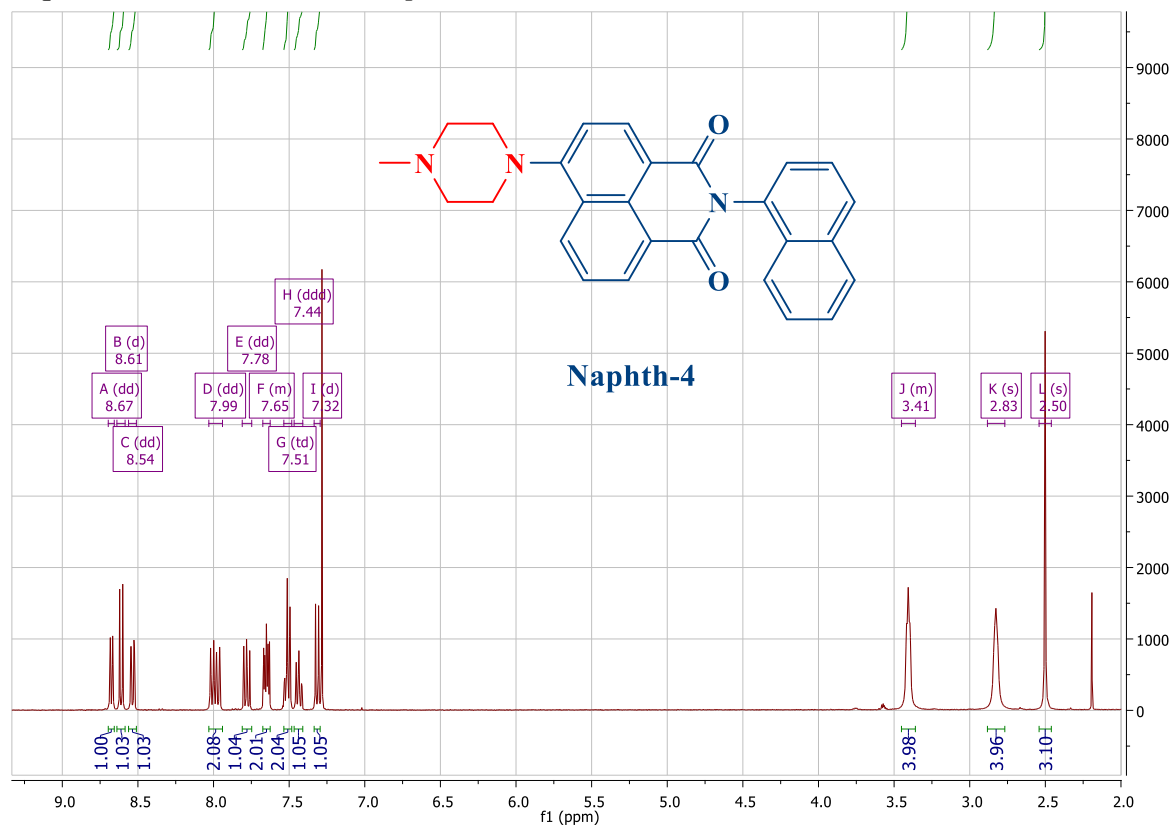

$^{13}\text{C}$  NMR spectrum of 6-(4-Methylpiperazin-1-yl)-2-(naphthalen-1-yl)-1H-benzo[de]isoquinoline-1,3(2H)-dione (Naphth-4)

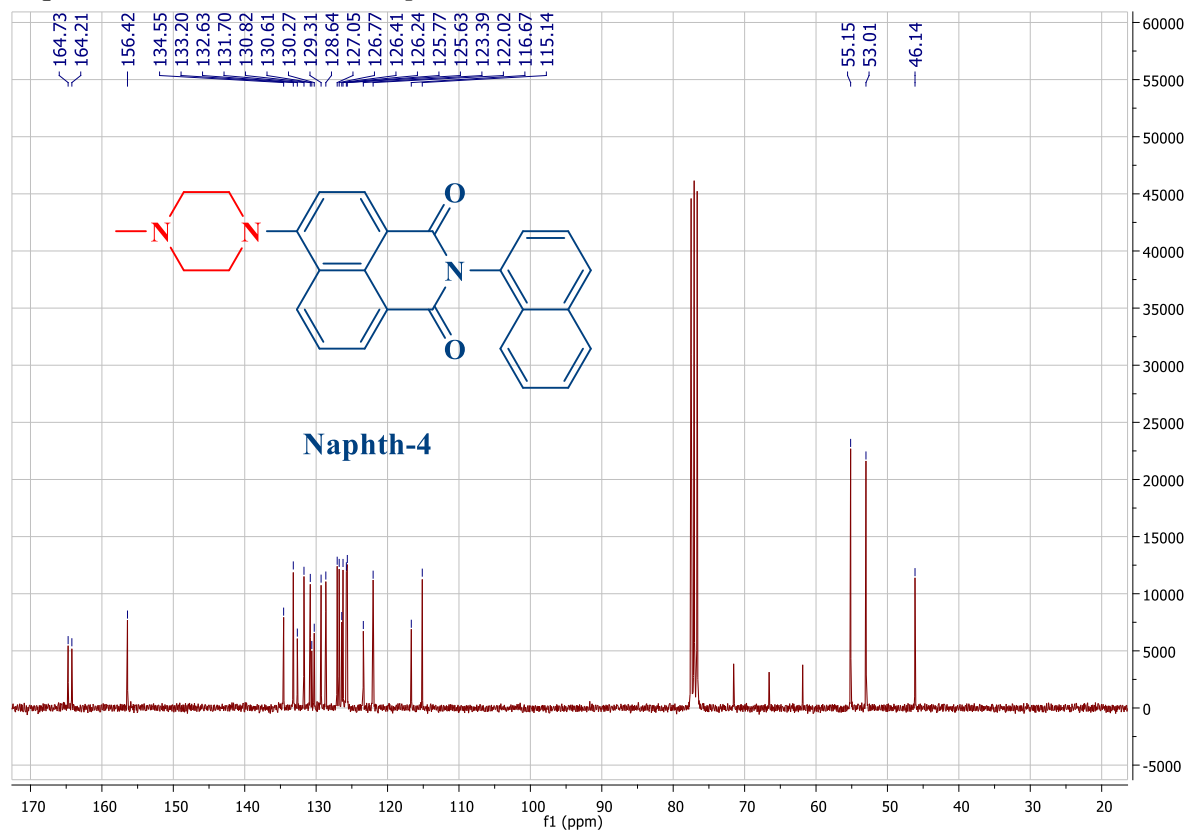

$^1\text{H}$  NMR spectrum of 6-(hexylamino)-2-(naphthalen-1-yl)-1H-benzo[de]isoquinoline-1,3(2H)-dione (Naphth-5)

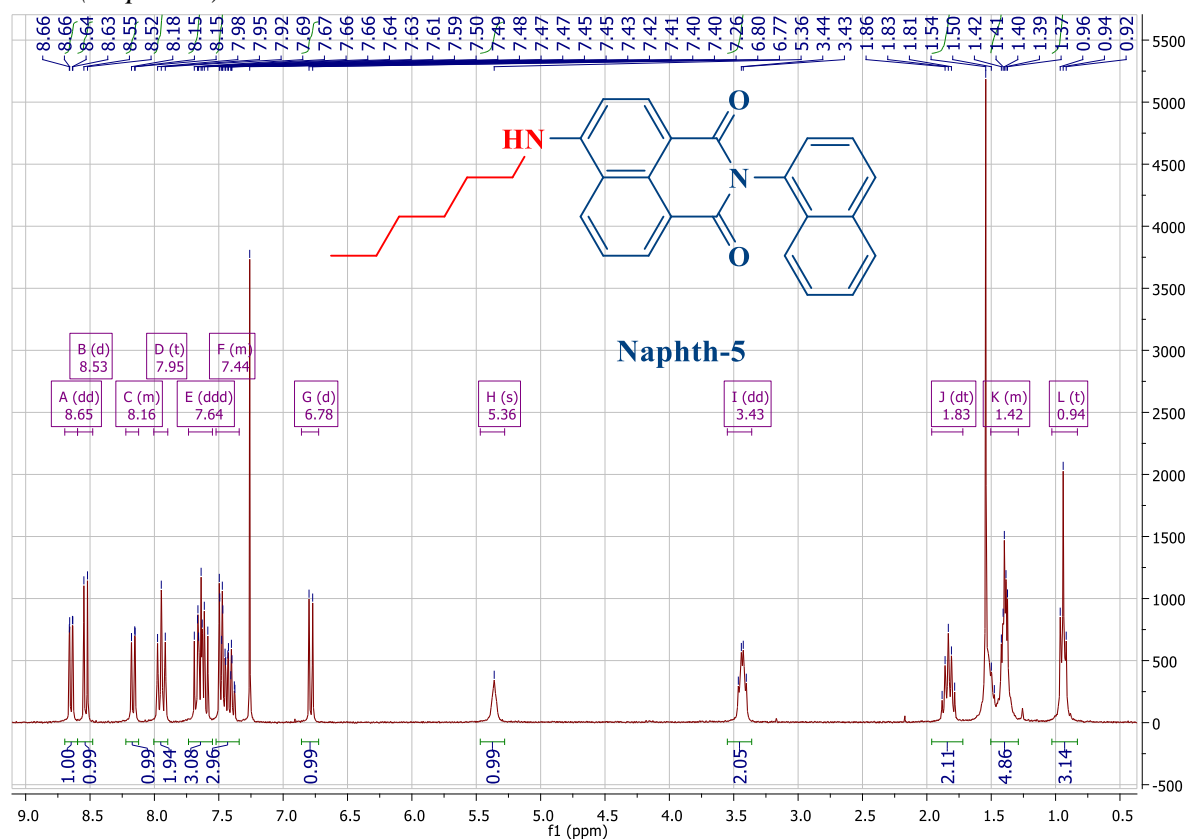

$^{13}\text{C}$  NMR spectrum of 6-(hexylamino)-2-(naphthalen-1-yl)-1H-benzo[de]isoquinoline-1,3(2H)-dione (Naphth-5)

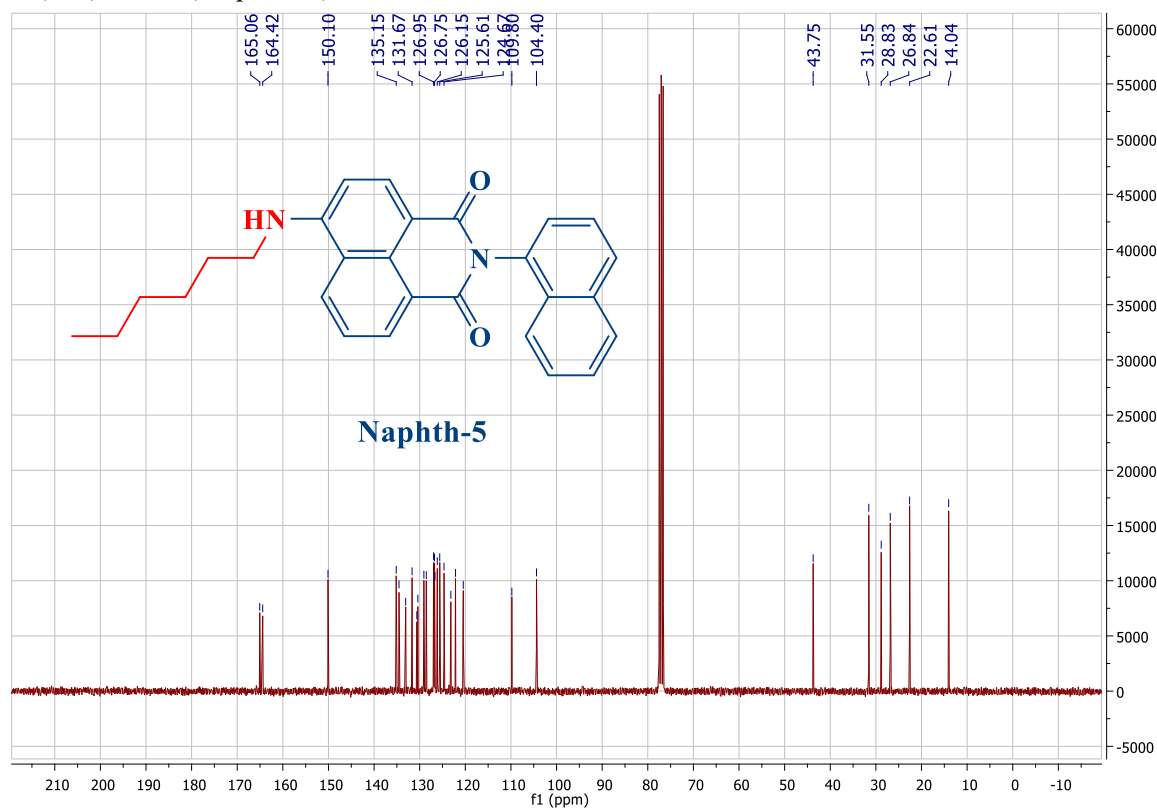

|                                                                                                         | HOMO                                                                                | LUMO                                                                                  |
|---------------------------------------------------------------------------------------------------------|-------------------------------------------------------------------------------------|---------------------------------------------------------------------------------------|
| <b>(Napht-1)</b><br>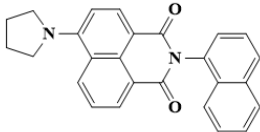   | 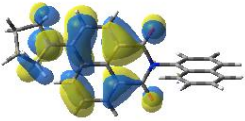   | 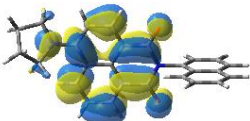   |
| <b>(Napht-2)</b><br>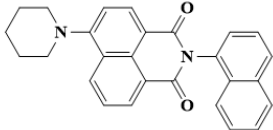   | 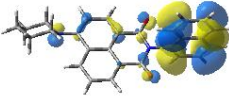   | 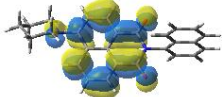   |
| <b>(Napht-3)</b><br>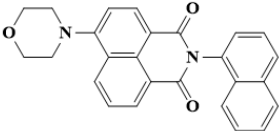   | 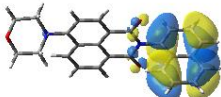   | 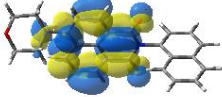   |
| <b>(Napht-4)</b><br>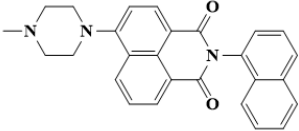  | 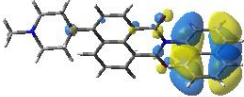  | 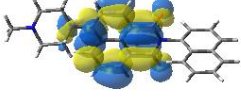  |
| <b>(Napht-5)</b><br>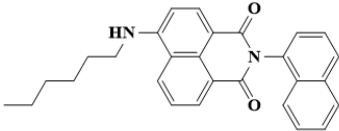 | 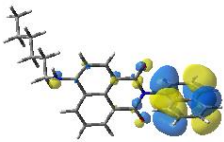 | 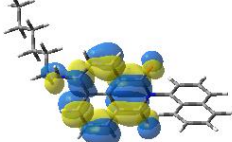 |

**Figure S1.** Contour plots of HOMOs and LUMOs for Napht-1 to Napht-5; structures optimized at the B3LYP/6-31G\* level of theory.
